# Supplementary material for: Analysis of Chinese Consumers’ Nutrition Facts Table Use Behavior Based on Knowledge-Attitude-Practice Model
Source: MDPI journal article supplement (doi:10.3390/ijerph182212247), 2021-11-22
Supplement: s1 [file s1]

## Supplementary materials: The questionnaire.

**Table S1.** Knowledge about nutrition facts table.

| Knowledge about nutrition facts                                                                    | strongly disagree | disagree | neither agree nor disagree | agree | strongly agree |
|----------------------------------------------------------------------------------------------------|-------------------|----------|----------------------------|-------|----------------|
| I know the concept and function of nutrient reference values (NRV) from the nutrition facts table. |                   |          |                            |       |                |
| I know the concept and function of energy information from the nutrition facts table.              |                   |          |                            |       |                |
| I know the concept and function of carbohydrate information from the nutrition facts table         |                   |          |                            |       |                |
| I know the concept and function of fat information from the nutrition facts table.                 |                   |          |                            |       |                |
| I know the concept and function of protein information from the nutrition facts table.             |                   |          |                            |       |                |
| I know the concept and function of sodium information from the nutrition facts table.              |                   |          |                            |       |                |

**Table S2.** Attitude to nutrition facts table.

| Attitude to nutrition facts                                                                 | strongly disagree | disagree | neither agree nor disagree | agree | strongly agree |
|---------------------------------------------------------------------------------------------|-------------------|----------|----------------------------|-------|----------------|
| I believe the nutrition facts table could be used to compare nutrients among similar foods. |                   |          |                            |       |                |
| I believe the nutrition facts table could be used to choose healthy food.                   |                   |          |                            |       |                |
| I believe the nutrition facts table could be used to understand nutrients in food.          |                   |          |                            |       |                |

**Table S3.** Use of nutrition facts table.

| Use of nutrition facts                                                    | strongly disagree | disagree | neither agree nor disagree | agree | strongly agree |
|---------------------------------------------------------------------------|-------------------|----------|----------------------------|-------|----------------|
| I read the nutrition facts table when food shopping.                      |                   |          |                            |       |                |
| I use the nutrition facts table as a food purchase reference.             |                   |          |                            |       |                |
| I use the nutrition facts table to compare nutrients among similar foods. |                   |          |                            |       |                |

**Table S4.** Demographic characteristics table.

| Demographic characteristics                     |                                                                                                                                                          |
|-------------------------------------------------|----------------------------------------------------------------------------------------------------------------------------------------------------------|
| Your gender                                     | A. Male<br>B. Female                                                                                                                                     |
| Your age                                        | A. Under 18 years old<br>B. 18-44 years old<br>C. 45-59 years old<br>D. 60 years old and above                                                           |
| Your education level                            | A. Primary school and below<br>B. Junior high school<br>C. High school<br>D. College/Bachelor<br>E. Postgraduate or above                                |
| Your individual annual income on average (Yuan) | A. Below 10,000 Yuan<br>B. 10,000–50,000 Yuan<br>C. 50,0001–100,000 Yuan<br>D. 100,001–150,000 Yuan<br>E. 150,0001–200,000 Yuan<br>F. Above 200,000 Yuan |
